# Supplementary material
Source: publisher site journal article supplement (https://cdn.jamanetwork.com/ama/content_public/journal/psych/938559/yoi200029supp2_prod_1601309843.49394.pdf)
Supplement: Supplementary file 1 [file yoi200029supp2_prod_1601309843.49394.pdf]

## Supplementary Online Content

Berk M, Woods RL, Nelson MR, et al. Effect of aspirin vs placebo on the prevention of depression in older people: a randomized clinical trial. *JAMA Psychiatry*. Published online June 3, 2020. doi:10.1001/jamapsychiatry.2020.1214

**eTable.** Exploratory Outcomes (CESD-10 $\geq$ 10, and  $\geq$ 12) Comparison in Aspirin and Placebo: Odds Ratios at Follow-Up Annual Visits

This supplementary material has been provided by the authors to give readers additional information about their work.

**eTable. Exploratory Outcomes (CESD-10 $\geq$ 10, and  $\geq$ 12) Comparison in Aspirin and Placebo: Odds Ratios at Follow-Up Annual Visits <sup>a</sup>**

|                   |          | n      | Aspirin    | Placebo    | OR ratio <sup>b</sup><br>(95%CI) |
|-------------------|----------|--------|------------|------------|----------------------------------|
| CESD-10 $\geq$ 10 | Baseline | 19,110 | 470 (4.9)  | 484 (5.1)  |                                  |
|                   | Year 1   | 18,100 | 872 (9.7)  | 809 (8.9)  | 1.12 (0.97, 1.28)                |
|                   | Year 2   | 7,132  | 344 (9.7)  | 304 (8.4)  | 1.17 (0.98, 1.40)                |
|                   | Year 3   | 15,170 | 802 (10.6) | 766 (10.1) | 1.08 (0.93, 1.25)                |
|                   | Year 4   | 10,409 | 515 (10.0) | 520 (9.9)  | 1.05 (0.90, 1.23)                |
|                   | Year 5   | 7,257  | 407 (11.3) | 399 (10.9) | 1.07 (0.90, 1.26)                |
|                   | Year 6   | 2,708  | 161 (11.9) | 139 (10.2) | 1.24 (0.99, 1.55)                |
| CESD-10 $\geq$ 12 | Baseline | 19,110 | 263 (2.8)  | 261 (2.7)  |                                  |
|                   | Year 1   | 18,100 | 532 (5.9)  | 578 (5.3)  | 1.11 (0.92, 1.34)                |
|                   | Year 2   | 7,132  | 192 (5.4)  | 177 (4.9)  | 1.07 (0.84, 1.37)                |
|                   | Year 3   | 15,170 | 472 (6.3)  | 456 (6.0)  | 1.02 (0.84, 1.24)                |
|                   | Year 4   | 10,409 | 320 (6.2)  | 312 (5.9)  | 1.05 (0.85, 1.28)                |
|                   | Year 5   | 7,257  | 237 (6.6)  | 231 (6.3)  | 1.03 (0.83, 1.29)                |
|                   | Year 6   | 2,708  | 90 (6.7)   | 74 (5.5)   | 1.25 (0.93, 1.69)                |

<sup>a</sup> *P* value and (test statistic) for intervention by follow-up interaction (year) test: Chi-square 6.01, df 6, *P*=0.422 for CESD-10 $\geq$ 10, and Chi-square 3.33, df 6, *P*=0.708 for CESD-10 $\geq$ 12.

<sup>b</sup> Aspirin effect: OR comparing aspirin to placebo at follow-up annual visit divided by the OR comparing the two groups at baseline
